# Supplementary material
Source: PubMed Central journal article supplement (PMC1987713)

**Supplemental materials.**

**Table S1.** The sensitivity analyses were based on varying one specific parameter while keeping all others unchanged and observing the effect on  $Q_{NO}$  at  $t = 10$  s at steady state. The NOS1 concentration was  $0.9 \mu\text{M}$ , the  $\text{O}_2$  concentration was  $100 \mu\text{M}$ , and the arginine concentration was  $100 \mu\text{M}$ .

|          | k <sub>1</sub>                                          |                                               | k <sub>1</sub>                   |                                               | k <sub>2</sub>                   |                                               | k <sub>3</sub>                   |                                               | k <sub>4</sub>                                          |                                               | k <sub>4</sub>                                          |                                               |
|----------|---------------------------------------------------------|-----------------------------------------------|----------------------------------|-----------------------------------------------|----------------------------------|-----------------------------------------------|----------------------------------|-----------------------------------------------|---------------------------------------------------------|-----------------------------------------------|---------------------------------------------------------|-----------------------------------------------|
|          | parameter<br>( $\mu\text{M}^{-1} \cdot \text{s}^{-1}$ ) | Q <sub>NO</sub><br>( $\mu\text{M}/\text{s}$ ) | parameter<br>( $\text{s}^{-1}$ ) | Q <sub>NO</sub><br>( $\mu\text{M}/\text{s}$ ) | parameter<br>( $\text{s}^{-1}$ ) | Q <sub>NO</sub><br>( $\mu\text{M}/\text{s}$ ) | parameter<br>( $\text{s}^{-1}$ ) | Q <sub>NO</sub><br>( $\mu\text{M}/\text{s}$ ) | parameter<br>( $\mu\text{M}^{-1} \cdot \text{s}^{-1}$ ) | Q <sub>NO</sub><br>( $\mu\text{M}/\text{s}$ ) | parameter<br>( $\text{s}^{-1}$ )                        | Q <sub>NO</sub><br>( $\mu\text{M}/\text{s}$ ) |
| Original | 6.6                                                     | 1.16                                          | 6.6                              | 1.16                                          | 20.8                             | 1.16                                          | 20.8                             | 1.16                                          | 6.6                                                     | 1.16                                          | 6.6                                                     | 1.16                                          |
| Test 1   | 0.66                                                    | 1.16                                          | 0.66                             | 1.16                                          | 2.08                             | 1.15                                          | 2.08                             | 0.66                                          | 0.66                                                    | 1.16                                          | 0.66                                                    | 1.16                                          |
| Test 2   | 33.0                                                    | 1.16                                          | 33.0                             | 1.16                                          | 104.0                            | 1.17                                          | 104.0                            | 1.24                                          | 33.0                                                    | 1.16                                          | 33.0                                                    | 1.16                                          |
| Test 3   | 66.0                                                    | 1.16                                          | 66.0                             | 1.16                                          | 208.0                            | 1.19                                          | 208.0                            | 1.26                                          | 66.0                                                    | 1.16                                          | 66.0                                                    | 1.16                                          |
|          | k <sub>5</sub>                                          |                                               | k <sub>5</sub>                   |                                               | k <sub>6</sub>                   |                                               | k <sub>7</sub>                   |                                               | k <sub>8</sub>                                          |                                               | k <sub>8</sub> '                                        |                                               |
|          | parameter<br>( $\mu\text{M}^{-1} \cdot \text{s}^{-1}$ ) | Q <sub>NO</sub><br>( $\mu\text{M}/\text{s}$ ) | parameter<br>( $\text{s}^{-1}$ ) | Q <sub>NO</sub><br>( $\mu\text{M}/\text{s}$ ) | parameter<br>( $\text{s}^{-1}$ ) | Q <sub>NO</sub><br>( $\mu\text{M}/\text{s}$ ) | parameter<br>( $\text{s}^{-1}$ ) | Q <sub>NO</sub><br>( $\mu\text{M}/\text{s}$ ) | parameter<br>( $\text{s}^{-1}$ )                        | Q <sub>NO</sub><br>( $\mu\text{M}/\text{s}$ ) | parameter<br>( $\mu\text{M}^{-1} \cdot \text{s}^{-1}$ ) | Q <sub>NO</sub><br>( $\mu\text{M}/\text{s}$ ) |
| Original | 8.5                                                     | 1.16                                          | 215.6                            | 1.16                                          | 175.6                            | 1.16                                          | 20.8                             | 1.16                                          | 13.2                                                    | 1.16                                          | 13.2                                                    | 1.16                                          |
| Test 1   | 0.85                                                    | 1.10                                          | 2.16                             | 1.16                                          | 17.6                             | 1.01                                          | 2.08                             | 0.58                                          | 1.32                                                    | 1.16                                          | 1.32                                                    | 1.18                                          |
| Test 2   | 42.5                                                    | 1.16                                          | 21.6                             | 1.16                                          | 878.0                            | 1.17                                          | 104.0                            | 1.27                                          | 66.0                                                    | 1.16                                          | 66.0                                                    | 1.10                                          |
| Test 3   | 85.0                                                    | 1.16                                          | 2156.0                           | 1.12                                          | 1756.0                           | 1.17                                          | 208.0                            | 1.28                                          | 132.0                                                   | 1.17                                          | 132.0                                                   | 1.04                                          |
|          | k <sub>9</sub>                                          |                                               | k <sub>9</sub> '                 |                                               | k <sub>10</sub>                  |                                               | k <sub>11</sub>                  |                                               | k <sub>12</sub>                                         |                                               | k <sub>13</sub>                                         |                                               |
|          | parameter<br>( $\mu\text{M}^{-1} \cdot \text{s}^{-1}$ ) | Q <sub>NO</sub><br>( $\mu\text{M}/\text{s}$ ) | parameter<br>( $\text{s}^{-1}$ ) | Q <sub>NO</sub><br>( $\mu\text{M}/\text{s}$ ) | parameter<br>( $\text{s}^{-1}$ ) | Q <sub>NO</sub><br>( $\mu\text{M}/\text{s}$ ) | parameter<br>( $\text{s}^{-1}$ ) | Q <sub>NO</sub><br>( $\mu\text{M}/\text{s}$ ) | parameter<br>( $\mu\text{M}^{-1} \cdot \text{s}^{-1}$ ) | Q <sub>NO</sub><br>( $\mu\text{M}/\text{s}$ ) | parameter<br>( $\text{s}^{-1}$ )                        | Q <sub>NO</sub><br>( $\mu\text{M}/\text{s}$ ) |
| Original | 8.6                                                     | 1.16                                          | 399.2                            | 1.16                                          | 39.1                             | 1.16                                          | 20.8                             | 1.16                                          | 0.01                                                    | 1.16                                          | 39.9                                                    | 1.16                                          |
| Test 1   | 0.86                                                    | 0.86                                          | 3.99                             | 1.20                                          | 3.91                             | 0.65                                          | 1.04                             | 4.36                                          | 0.001                                                   | 0.16                                          | 3.99                                                    | 0.14                                          |
| Test 2   | 43.0                                                    | 1.20                                          | 39.9                             | 1.20                                          | 195.5                            | 1.25                                          | 2.08                             | 3.80                                          | 0.1                                                     | 2.93                                          | 199.5                                                   | 3.25                                          |
| Test 3   | 86.0                                                    | 1.20                                          | 3992.0                           | 0.88                                          | 391.0                            | 1.26                                          | 208.0                            | 0.15                                          | 1.0                                                     | 3.46                                          | 399.0                                                   | 4.21                                          |

**Figure S1.** NO production by NOS1 when the binding rates of L-arginine to the ferric ( $k_1$ ) and ferrous ( $k_4$ ) forms of NOS1 and the dissociation rates of L-arginine from the ferric ( $k_1'$ ) and ferrous ( $k_4'$ ) forms of NOS1 varied. Total NOS1 concentration was 0.9  $\mu\text{M}$ , L-arginine concentration was 100  $\mu\text{M}$ , and  $\text{O}_2$  concentration was 100  $\mu\text{M}$ . The apparent binding rate ( $k_1 + k_4$ ) of L-arginine to NOS1 heme was 2.5  $\mu\text{M}^{-1}\cdot\text{s}^{-1}$  and the apparent dissociation rate ( $k_1' + k_4'$ ) was 2.5  $\text{s}^{-1}$  at 15  $^\circ\text{C}$ . In (A), Case 1:  $k_1$  was taken as 10% and  $k_4$  was taken as 90% of the apparent binding rate; Case 2:  $k_1$  and  $k_4$  were each taken as 50% of the apparent binding rate; Case 3:  $k_1$  was taken as 90% and  $k_4$  was taken as 10% of the apparent binding rate. In (B), Case 1:  $k_1'$  was taken as 10% and  $k_4'$  was taken as 90% of the apparent dissociation rate; Case 2:  $k_1'$  and  $k_4'$  were each taken as 50% of the apparent dissociation rate; Case 3:  $k_1'$  was taken as 90% and  $k_4'$  was taken as 10% of the apparent dissociation rate. All other kinetic parameters were listed in Table 1. In all cases, the NO production was virtually the same.

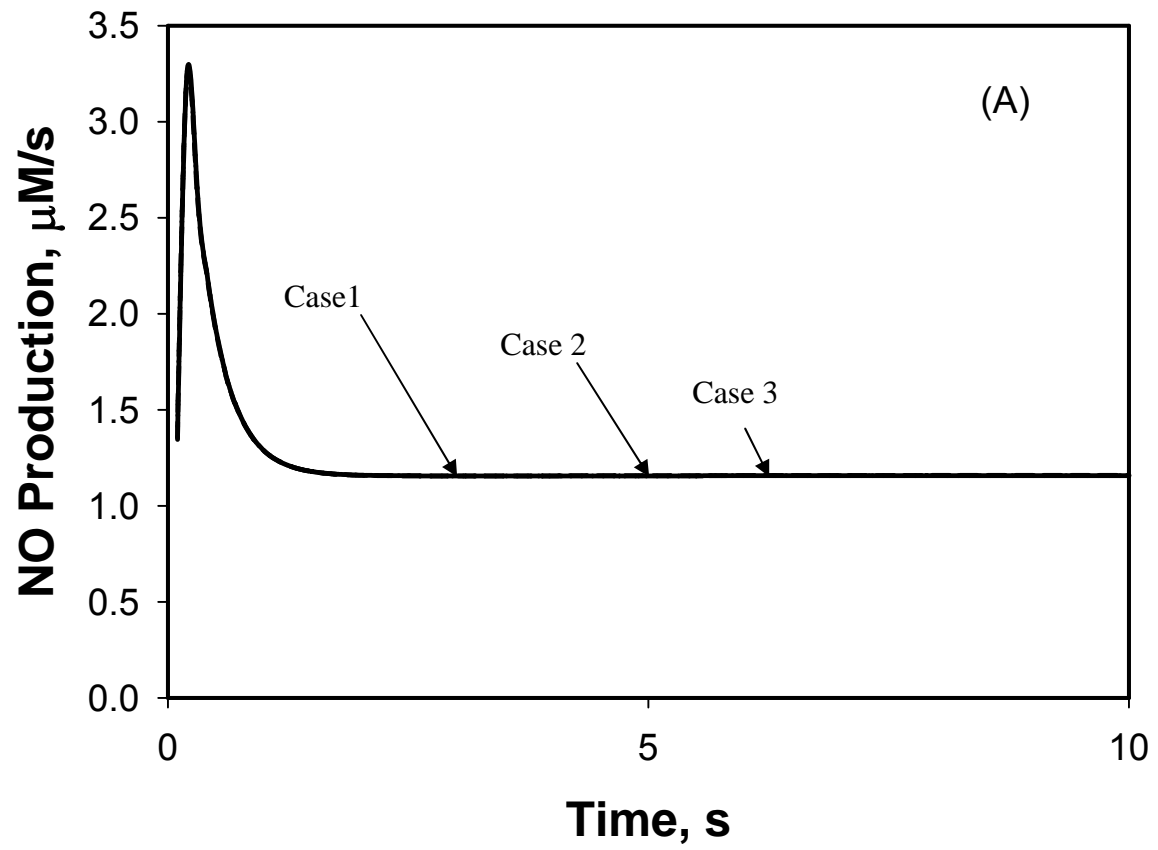

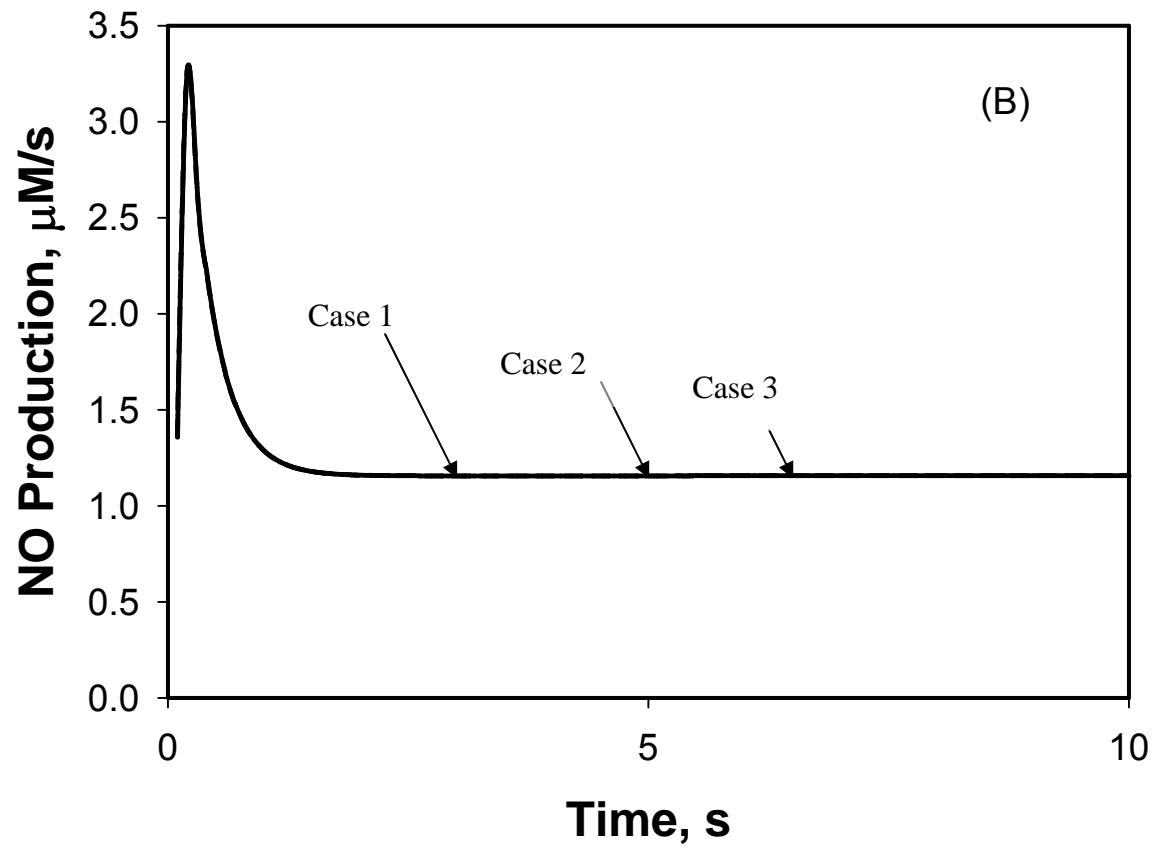

Supplement: NIHMS19571-supplement-supplement_1.pdf [file NIHMS19571-supplement-supplement_1.pdf]
